# Supplementary material for: Multi-Analytical Techniques to Define the Mineralogical and Petrophysical Characteristics and Provenance of Siliceous Lithic Findings: The Case Study of La Calvera Rock Shelter (Cantabria, Spain)
Source: MDPI journal article supplement (doi:10.3390/min13050666), 2023-05-12
Supplement: s1 [file s1]

## Supplementary Materials 1 (SM1)

### Methods

In order to carry out physical and mechanical tests, the specimens were dried at  $105 \pm 5$  °C and the dry solid mass ( $m_D$ ) was determined. The real volume ( $V_R$ ) of undisturbed rock specimens, with:

$$V_R = V_S + V_C$$

where  $V_S$  is the solid phases volume of specimens and  $V_C$  is the volume of pores of the specimens that are closed to helium, was determined by helium Ultrapycnometer 1000 (Quantachrome Instruments). Then, the wet solid mass ( $m_w$ ) of the samples was determined until constant weight. Through a hydrostatic analytical balance, the bulk volume ( $V_B$ ) was calculated as:

$$V_B = V_S + V_O + V_C$$

where  $V_O = V_B - V_R$  is the volume of pores open to helium and  $V_B$  is calculated as:

$$V_B = \left[ \frac{(m_w - m_{HY})}{\rho_{WT}} \right] \cdot 100$$

where  $m_{HY}$  is the hydrostatic mass of the wet specimen and  $\rho_{WT}$  is the water density at a temperature of 25 °C.

Total porosity ( $\Phi_T$ ), water/helium open porosity ( $(\Phi_{O H_2O-He})$ ), water/helium closed porosity ( $\Phi_{C H_2O-He}$ ), weight imbibition coefficient ( $IC_w$ ), saturation index (SI), bulk ( $\rho_B$ ) and real ( $\rho_R$ ) densities were computed as:

$$\begin{aligned} \Phi_T &= \left[ \frac{(V_B - V_S)}{V_B} \right] \cdot 100; \quad \Phi_{O H_2O} = \left\{ \frac{\left[ \frac{(m_w - m_D)}{\rho_{WTx}} \right]}{V_B} \right\} \cdot 100; \quad \Phi_{O He} = \left[ \frac{(V_B - V_R)}{V_B} \right] \cdot 100 \\ \Phi_{C H_2O} &= \Phi_T - \Phi_{O H_2O}; \quad \Phi_{C He} = \Phi_T - \Phi_{O He} \\ IC_w &= \left[ \frac{(m_w - m_D)}{m_D} \right] \cdot 100; \quad SI = \left( \frac{\Phi_{O H_2O}}{\Phi_{O He}} \right) = \left\{ \frac{\left[ \frac{(m_w - m_D)}{\rho_{WTx}} \right]}{V_O} \right\} \cdot 100 \\ \rho_R &= \frac{m_D}{V_R}; \quad \rho_B = \frac{m_D}{V_B} \end{aligned}$$

The punching strength index (PLT index) was determined with a Point Load Tester (mod. D550 Controls Instrument), according to ISRM Recommendations (ISRM, 1985). The puncturing resistance index ( $I_s$ ) was calculated as:

$$I_s = \frac{P}{De^2}$$

where  $P$  is the breaking load and  $De$  is the “equivalent diameter of the cylindrical specimen” (ISRM, 1972, 1985) with:

$$De = \frac{4A}{\pi}; \quad A = W \cdot D$$

where  $W$  and  $2L$  are the width perpendicular to the load direction and length of specimen, respectively, and  $D$  is the distance between the two conical punches. The index value is referring to a standard cylindrical

specimen with diameter  $D = 50$  mm, for which it has been corrected with a shape coefficient (F) and calculated as:

$$IS_{(50)} = IS \cdot F = IS \cdot \left(\frac{De}{50}\right)^{0,45}$$
